# Supplementary material for: μDamID: A Microfluidic Approach for Joint Imaging and Sequencing of Protein-DNA Interactions in Single Cells
Source: PubMed Central journal article supplement — Cell Syst. Author manuscript; Available in PMC 2021 Oct 21. (PMC7588622; doi:10.1016/j.cels.2020.08.015), 2020-09-23
Supplement: NIHMS1625349-supplement-2.pdf [file NIHMS1625349-supplement-2.pdf]

## SUPPLEMENTAL INFORMATION

**A**

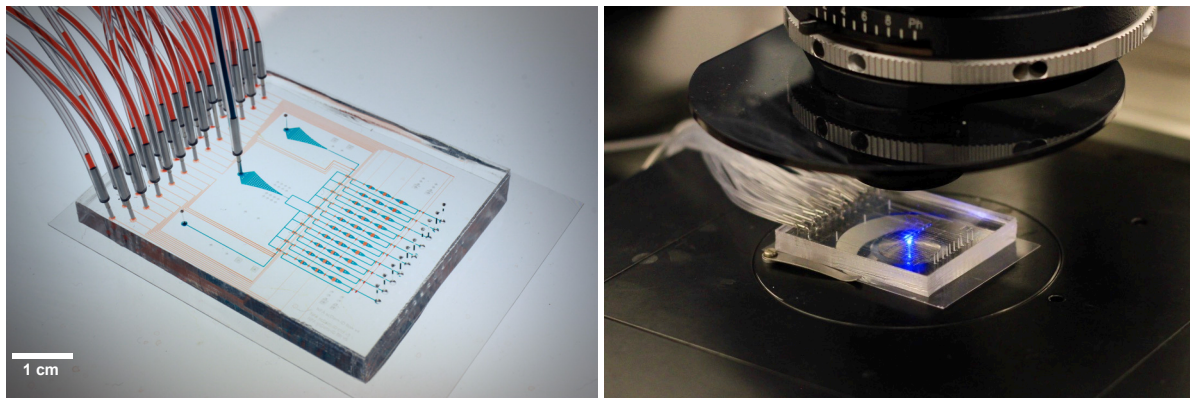

**B**

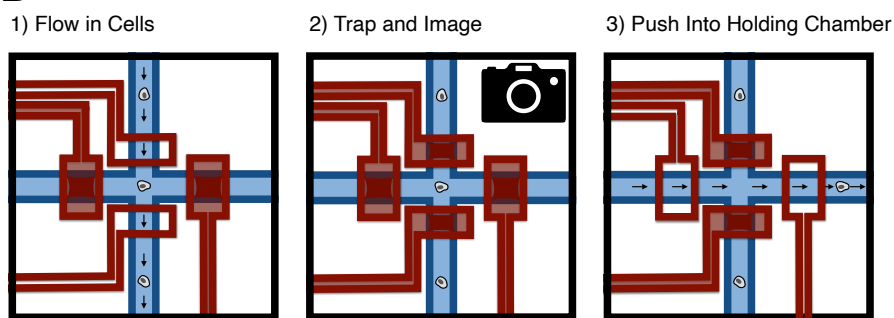

**C**

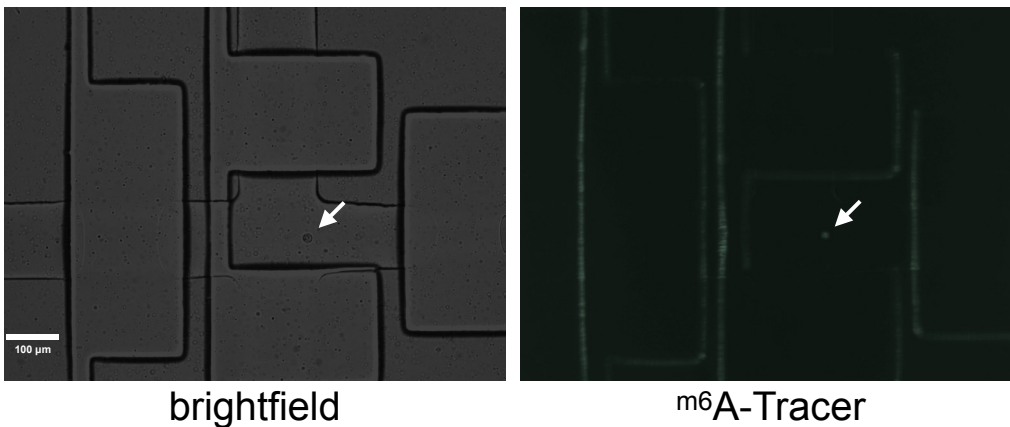

**Figure S1. Illustration of cell trapping procedure, related to Figure 1.**

(A) an image of the  $\mu$ DamID device, with the flow layer filled with blue food coloring and the control layer filled with red food coloring, alongside an image of the device as operated on an inverted microscope.

(B) Cells are driven through the device by peristaltic pumping or pressure-driven flow. Valves are actuated to confine the cell in the trapping region, where it is imaged, and if selected, it is pushed by dead-end filling into a holding chamber to the right of the trapping region.

(C) 10X magnification images of an actual cell held in the trapping chamber prior to high-resolution imaging and sequencing (cell #018, expressing untethered Dam).

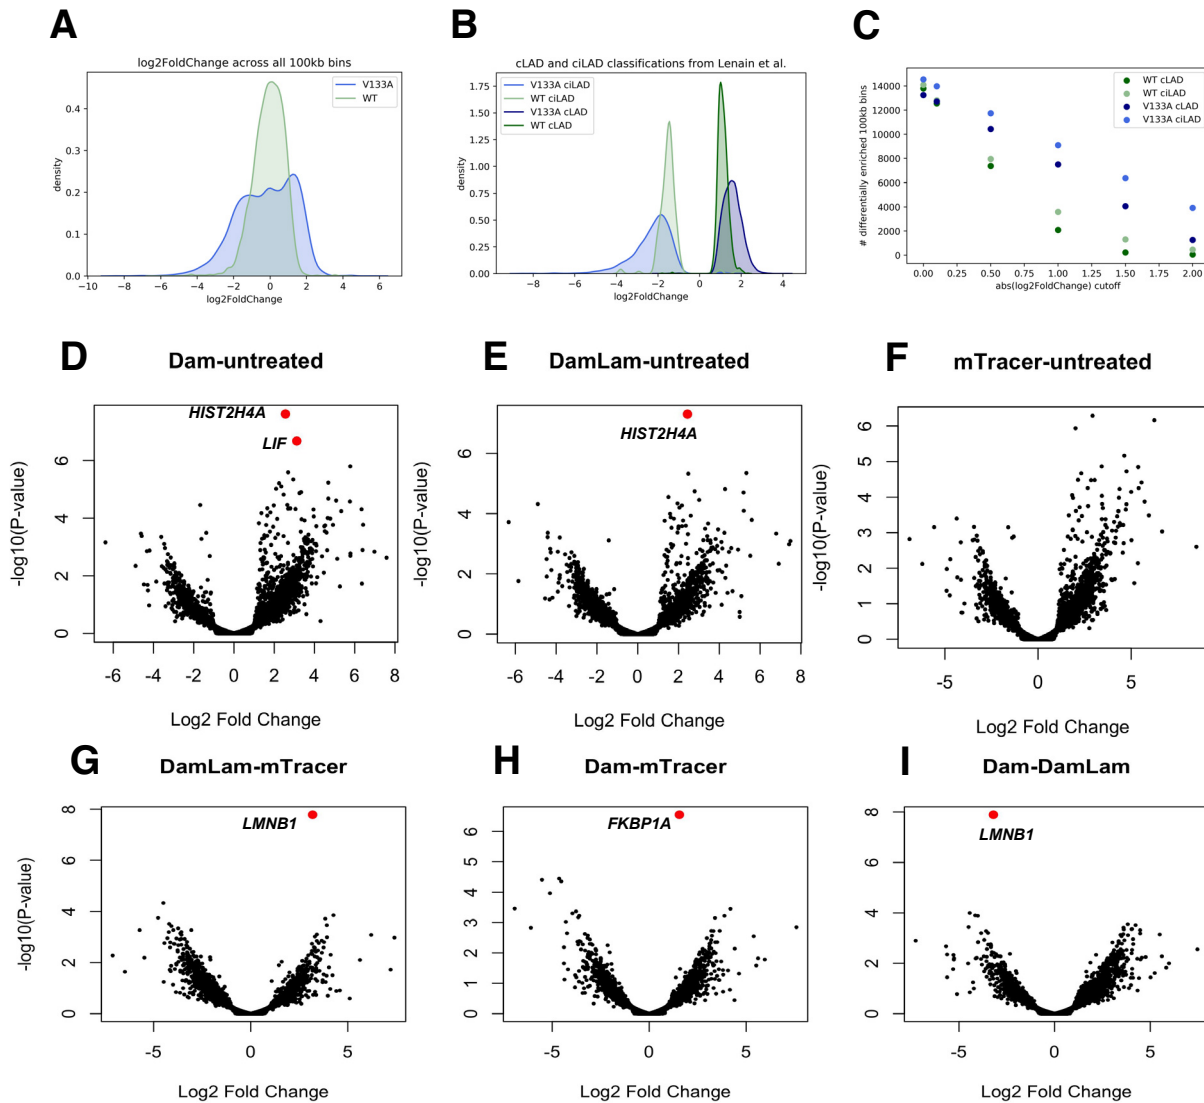

**Figure S2. Comparing Dam mutants & examining effect of Dam on gene expression, related to Figure 2.**

(A) Kernel density estimate of  $\log_2$ FoldChange from DESeq2 differential enrichment analysis of Dam-LMNB1 coverage compared to Dam-only as reference. With V133A, more extreme  $\log_2$ FoldChange values are observed with greater separation between the positive and negative  $\log_2$ FoldChange peaks. In other words, compared to wild-type, the V133A Dam-LMNB1 and Dam-only signals are more distinct.

(B) Kernel density estimate of  $\log_2$  Fold Change, with cLAD/ciLAD classification from Lenain et al. 2017 indicated, shows greater separation for cLAD and ciLAD signal with V133A.

(C) V133A has higher sensitivity than WT, with more differentially enriched regions at each  $\log_2$ FoldChange threshold for calling significant differential enrichment.

(D-I) Significantly differentially expressed genes ( $\log_2$ FC significantly > 1 and adjusted p-value < 0.01) are indicated in red for bulk HEK293T cells transfected with Dam, Dam-LMNB1,  $m^6$ A-Tracer, or no treatment control. Differentially expressed genes compared to no treatment control are *HIST2H4A* and *LIF* for Dam, *HIST2H4A* for Dam-LMNB1, and no genes for  $m^6$ A-Tracer. When comparing Dam to  $m^6$ A-Tracer, the only differentially expressed gene is *FKBP1A*, which is expected given the mutated *FKBP1A*-derived destabilization domain tethered to Dam in our construct. When comparing Dam-LMNB1 to  $m^6$ A-Tracer, the only differentially expressed gene is *LMNB1*, which is again expected given *LMNB1* is expressed from the *Dam-LMNB1* construct itself.

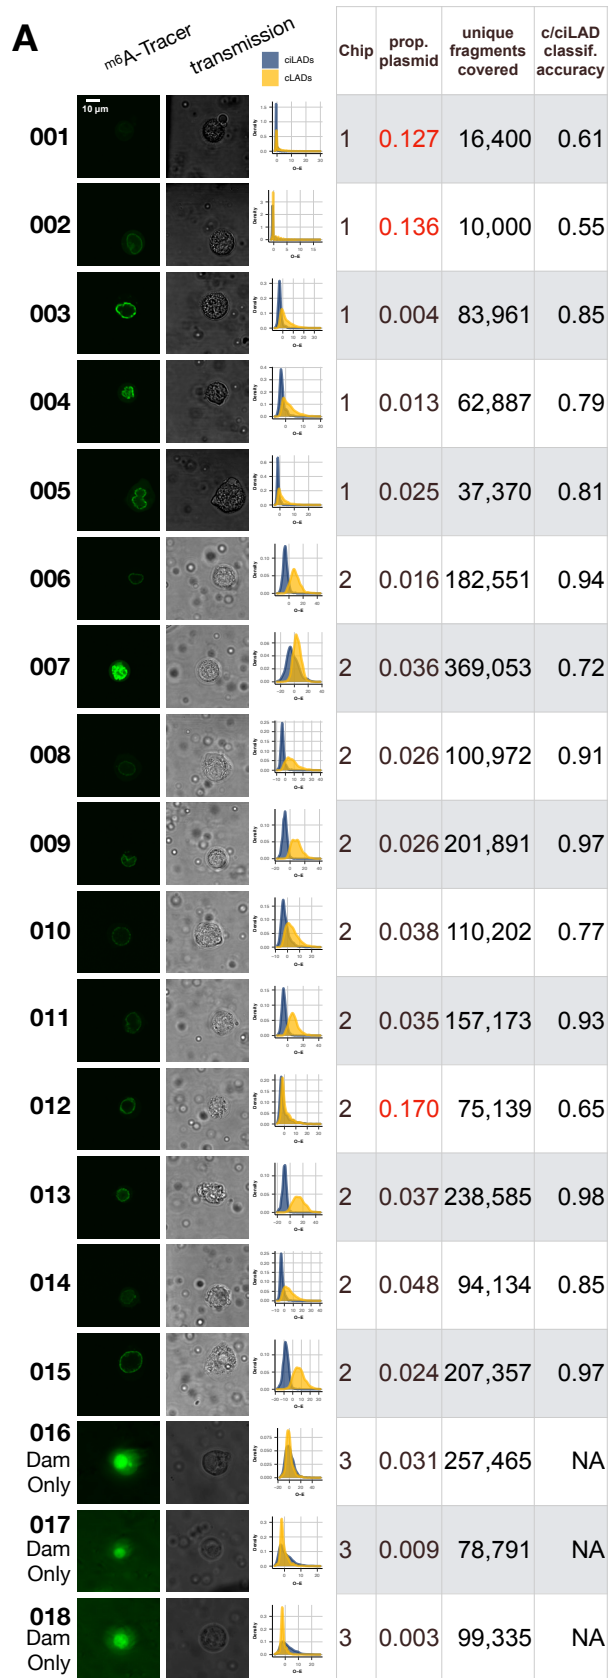

**Figure S3. Images and sequencing statistics for each cell, related to Figure 2.**

(A) Each row corresponds to a single batch 1 cell, showing its <sup>m6</sup>A-Tracer image, transmission image, coverage distributions in c/ciLAD control regions, identifier for the device (chip) it was sequenced on, proportion of reads mapping to the transfected plasmid, number of unique DpnI fragments covered in the genome, and classification accuracy on the c/ciLAD control regions. Nine confocal <sup>m6</sup>A-Tracer images from unsequenced Dam-only cells are provided for comparison to the widefield images acquired for cells 015, 016, and 018.

(B) Next Page: as in (A) but for 40 batch 2 cells, with Dam-tdTomato-LMNB1 images and library DNA yields added. Letters in each cell identifier indicate which device they were processed on.

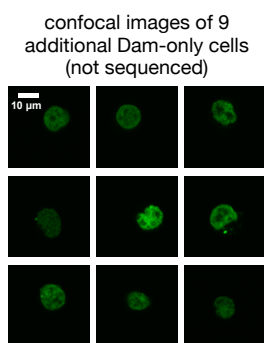

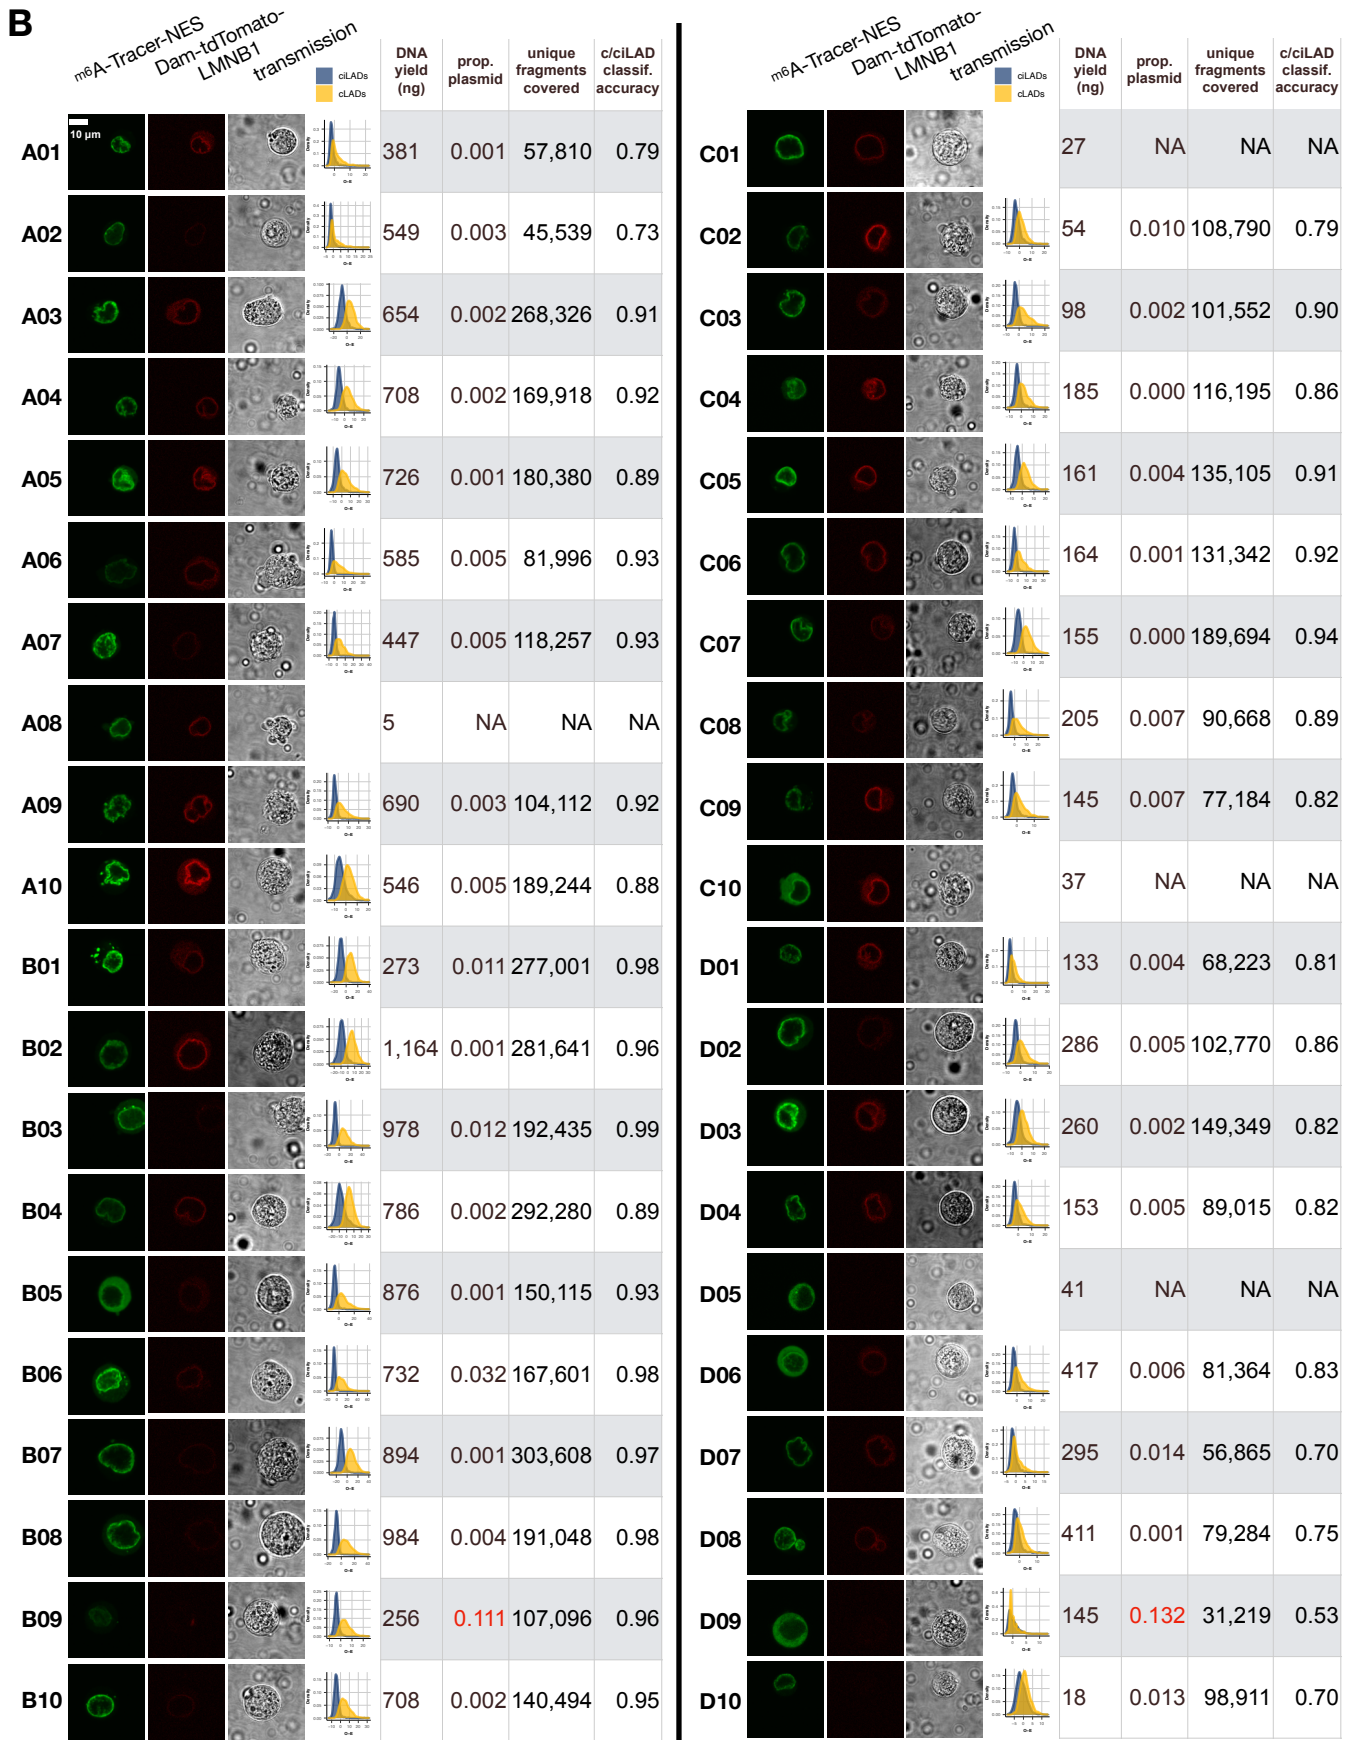

Figure S3 continued

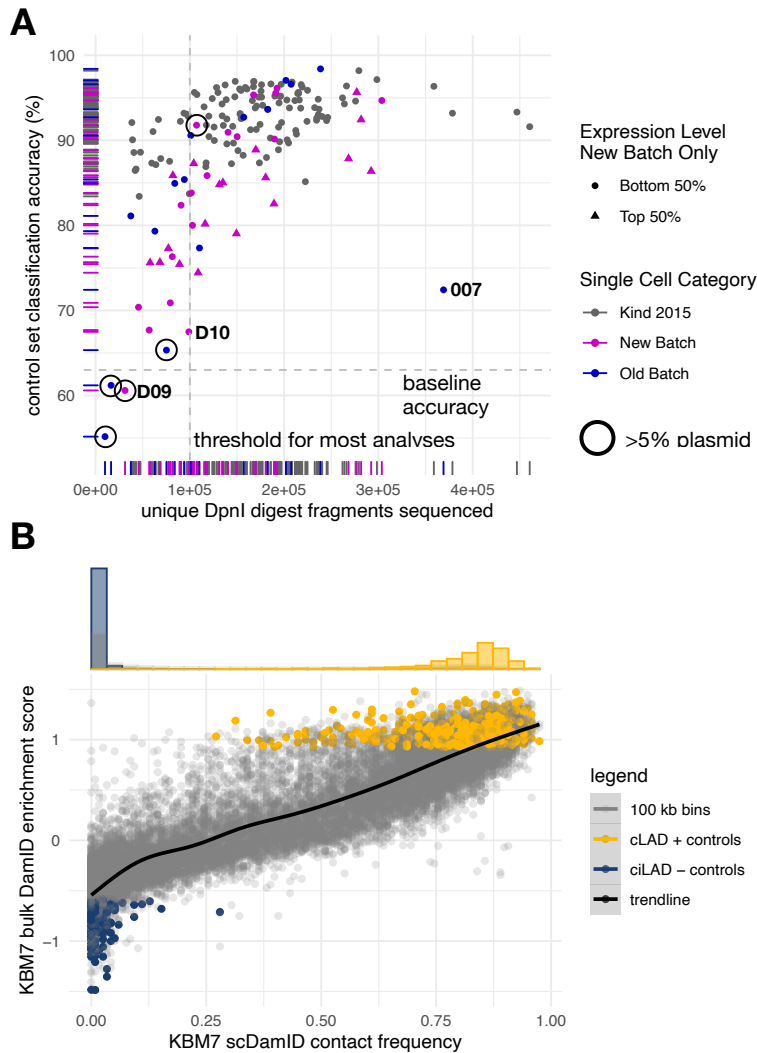

**Figure S4, related to Figure 2.**

(A) Similar to Figure 2D, a plot of classification accuracy vs library complexity (number of unique DpnI fragments covered), for all cells compared to single KBM7 cells from Kind et al. 2015 (gray points). Cell colors indicate which batch the cells were sequenced in, and batch 2 cells in the top half of Dam-tdTomato-LMNB1 expression levels are indicated as triangles. High-expression cells tend to have lower classification accuracies, as expected. Cells with fewer than 100k unique fragments show a drop in classification accuracy and were excluded from most downstream analyses. Cells with unusually high proportions of reads mapping to the transfection plasmid are circled. Rug plots are drawn on each axis. Cells D09 (no fluorescence at lamina or nuclear interior) and D10 (low DNA yield) are labeled, along with cell 007 (high m6A-Tracer signal in the nuclear interior, shown in Figure 3B).

(B) A plot of contact frequency vs. bulk DamID signal using data from KBM7 cells alone (Kind et al. 2015 and Lenain et al. 2017), showing high correlation ( $r=0.94$ ). Sets of stringent cLADs (gold points) and ciLADs (blue points) were identified in a similar fashion to those in HEK293T cells (top 1200 by ranked bulk DamID enrichment scores, but without a p-value cutoff since none was available, which may explain larger variance in CF values). Above is a histogram showing the distribution of contact frequencies within these control sets.

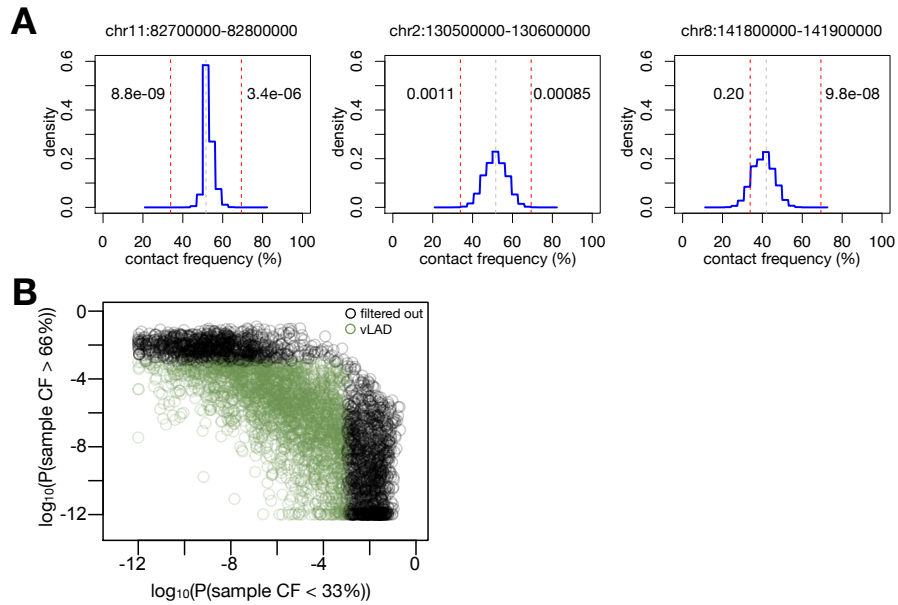

**Figure S5. Modeling and comparing single-cell contact frequencies between cell types, related to Figure 4.**

(A) For 3 individual bins in the genome (coordinates listed above each plot), a Poisson-Binomial distribution representing uncertainty in its sample contact frequency estimate after accounting for noise in the sequencing data (classification error rates on the control regions). Gray vertical dotted lines are the point estimate for each bin, and red dotted vertical lines are drawn at 11 and 21 out of 31 cells (CF roughly 33%-66%). Estimated probabilities of lying above or below this interval are indicated on each side of the plot. Note the difference in uncertainty between bins, as well as the difference in probabilities of lying outside the intermediate contact frequency interval.

(B) When filtering intermediate-contact-frequency bins to choose a final set of high-confidence variable LADs (vLADs), the measurement error distributions were used to select bins with the smallest probabilities of lying above or below the 33-66% CF interval ( $p < 0.001$  for each test, plotted in green).

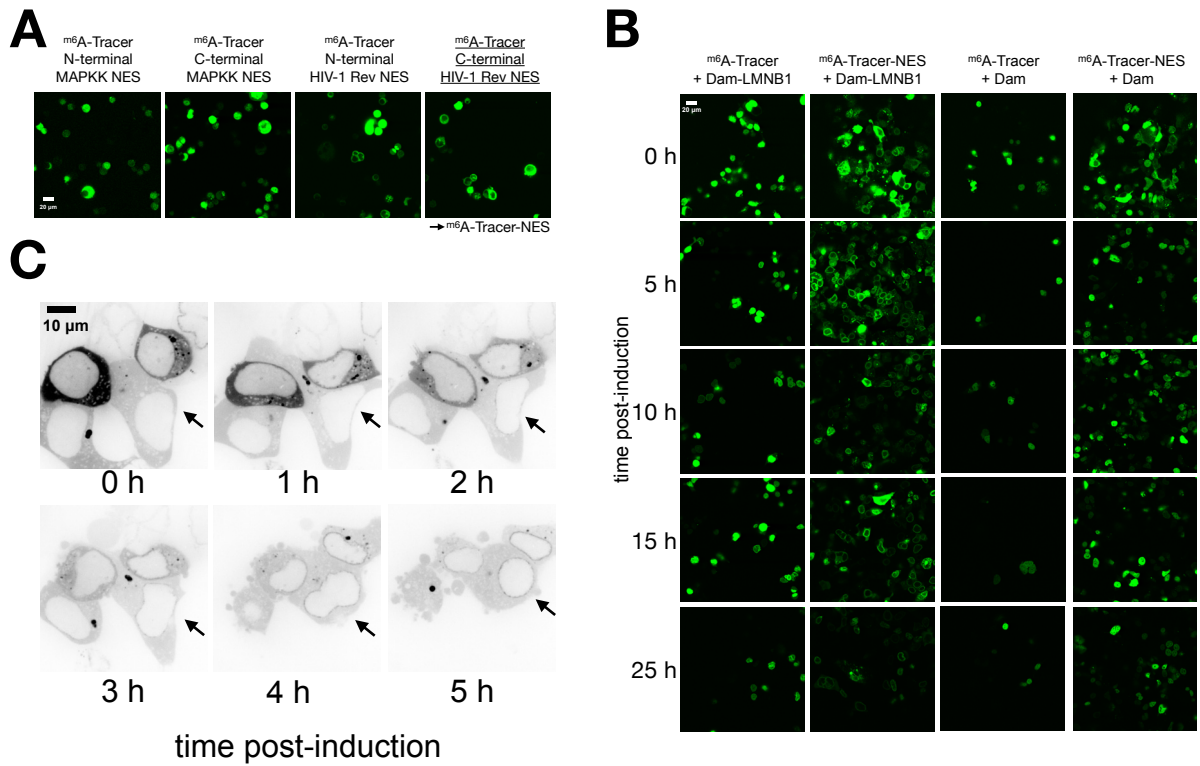

**Figure S6. Additional characterization of  $m^6A$ -Tracer-NES constructs, related to Figure 6.**

(A) Confocal microscope images showing the localization of  $m^6A$ -Tracer fluorescence when fused to one of two different Nuclear Export Signals on either terminus, in cells not expressing Dam. The HIV-1 Rev NES worked on either terminus and the C-terminal fusion was selected for downstream experiments.

(B) Time-lapse confocal images of  $m^6A$ -Tracer-NES or unmodified  $m^6A$ -Tracer fluorescence in different fields of cells, in cells co-expressing either Dam or Dam-LMNB1. Some nuclear localization is visible at time 0 in  $m^6A$ -Tracer-NES + Dam cells, likely owing to leaky expression prior to induction.

(C) Time-lapse confocal microscope images of  $m^6A$ -Tracer-NES fluorescence in the same field of cells at timepoints after Dam-LMNB1 expression. An inverted lookup table is used, and an arrow points to the nucleus of the same cell, which begins to show laminar signal around 2h post-induction.

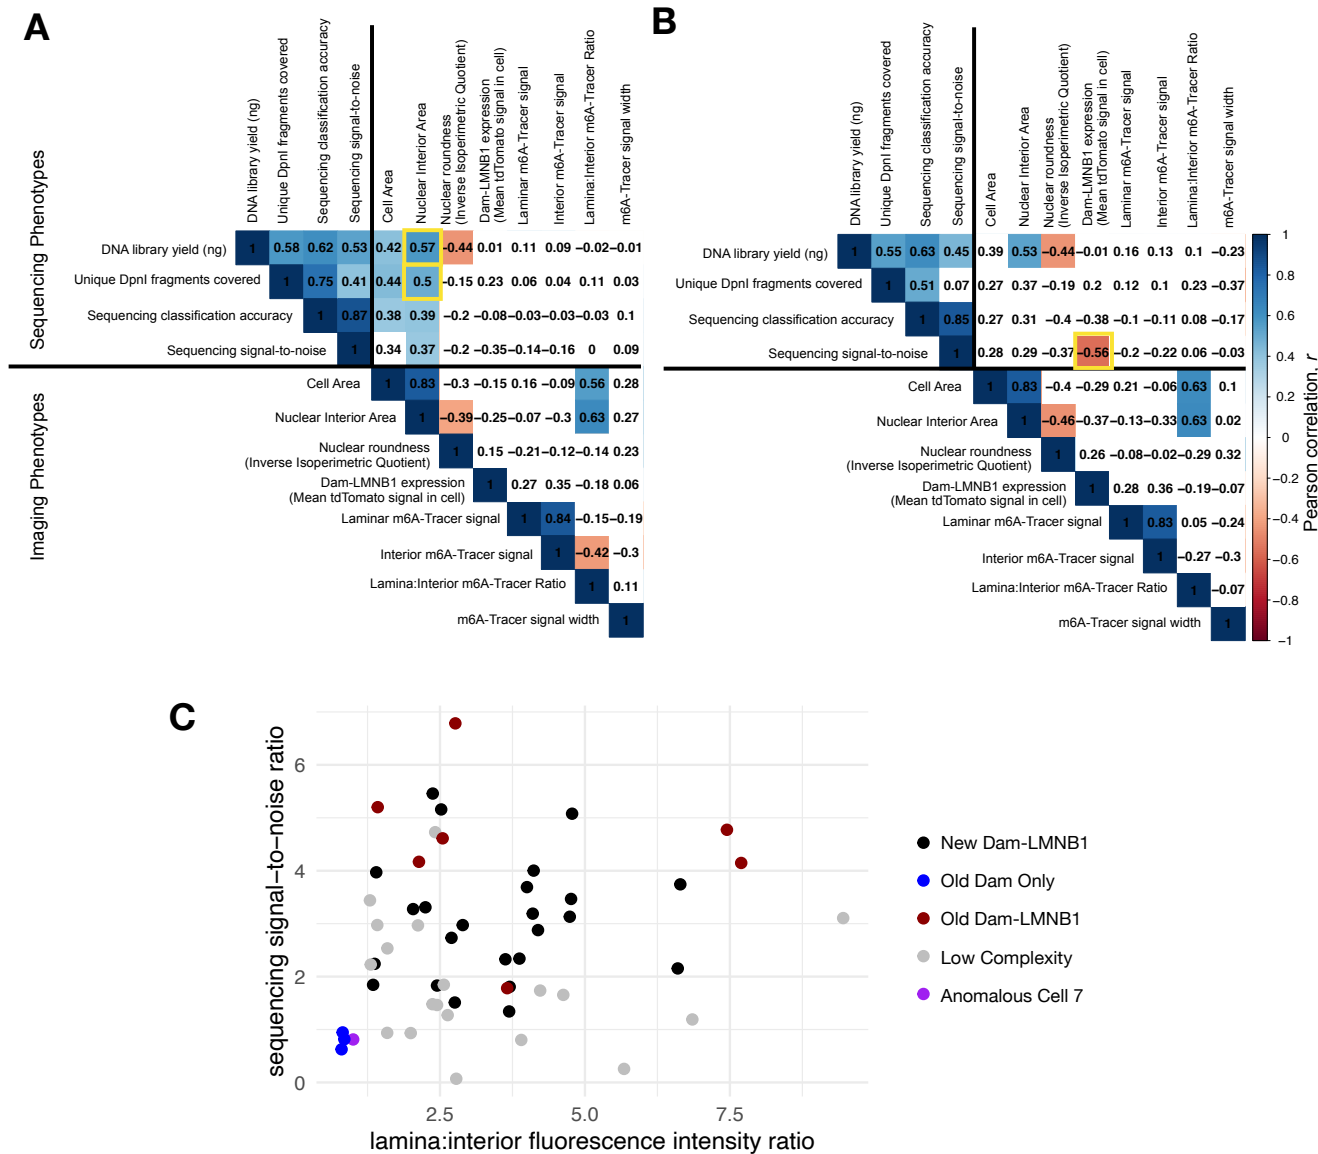

**Figure S7. Correlations of sequencing and imaging phenotypes, related to Figure 7.**

(A) A correlation matrix showing the relationships between imaging measures (see STAR Methods) and sequencing measures for 30 batch 2 cells with nuclear areas definable by tdTomato imaging. Correlations with  $p < 0.05$  are shaded white, while significant correlations are colored by the strength of their positive (blue) or negative (red) correlation. Associations that were further explored in Figure 7 are highlighted in yellow.

(B) As in (A) but after filtering cells to remove those with  $< 100k$  unique fragments, which confound estimates of classification accuracy.

(C) Imaging ratios are reported for each cell as in Figure 3C. Dark blue points represent Dam-only cells, and dark red points and black points represent Dam-LMN B1 cells from batch 1 and batch 2, respectively. The anomalous Dam-LMN B1 cell #007 (shown in Figure 3B) is highlighted in purple. Cells with fewer than 100k unique fragments are grayed out.
